# Supplementary material for: Application of Electrospun Drug-Loaded Nanofibers in Cancer Therapy
Source: MDPI journal article supplement (doi:10.3390/polym16040504), 2024-02-12
Supplement: s1 [file s1]

| <b>Table S1.</b> The research progress of cancer treatment applications listed in the article. |                                                    |                |           |            |       |
|------------------------------------------------------------------------------------------------|----------------------------------------------------|----------------|-----------|------------|-------|
| Cancer Type                                                                                    | Fluid Composition                                  | Drugs          | Cell Test | Mouse Test | Ref.  |
| Breast cancer                                                                                  | PGCL; PLGA                                         | PTX            | √         | √          | [117] |
|                                                                                                | N-CMCS; PVA; PCL                                   | DOX            | √         |            | [118] |
|                                                                                                | PEG; PLA                                           | DOX            | √         |            | [119] |
|                                                                                                | PLGA; GT; pluronic F127                            | PG             | √         |            | [120] |
|                                                                                                | ALG; CS; PCL                                       | Cap            | √         |            | [121] |
|                                                                                                | Mg; PCL                                            | DOX            | √         | √          | [122] |
|                                                                                                | CS; PLA; GO; TiO <sub>2</sub>                      | DOX            | √         |            | [123] |
|                                                                                                | Alginate dopamine; PVA; PCL                        | DTX            | √         |            | [124] |
|                                                                                                | CMC; polyvinyl alcohol; PCL                        | DOX            | √         |            | [126] |
|                                                                                                | SiO <sub>2</sub> ; PLGA                            | CUR            | √         |            | [127] |
|                                                                                                | PCL- Diol                                          | PTX            | √         | √          | [128] |
| Skin cancer                                                                                    | CA; PEG                                            | QUE            | √         |            | [130] |
|                                                                                                | PLGA; PCL                                          | DOX            | √         | √          | [131] |
|                                                                                                | CTAB; TEOS; iron oxide (II, III); SiO <sub>2</sub> | MET            | √         |            | [132] |
|                                                                                                | SA; DPPH                                           | TC             | √         |            | [133] |
|                                                                                                | GT; GP                                             | ACC            | √         | √          | [134] |
|                                                                                                | PLA; PCL                                           | AgNPs; TE      | √         |            | [135] |
| Cervical cancer                                                                                | PCL; CS                                            | cisplatin      | √         | √          | [136] |
|                                                                                                | PLGA                                               | AG             |           | √          | [137] |
|                                                                                                | PCL; CS                                            | FA             | √         |            | [138] |
|                                                                                                | PCL                                                | DSS            | √         |            | [139] |
|                                                                                                | CS; PVA                                            | DOX; ICG       |           | √          | [140] |
| Colon cancer                                                                                   | SF; PDO                                            | CUR; 5-FU      | √         | √          | [141] |
|                                                                                                | CS; PEO; PCL                                       | Lid; CUR       | √         |            | [65]  |
|                                                                                                | CS; gellan                                         | RES            | √         |            | [142] |
| Lung cancer                                                                                    | PCL; PEG                                           | 17-DMAG        | √         |            | [143] |
|                                                                                                | PLGA                                               | MET            | √         |            | [144] |
|                                                                                                | PVA; collagen                                      | /              | √         |            | [145] |
|                                                                                                | PLGA                                               | /              | √         |            | [146] |
| Brain cancer                                                                                   | PCL-Diol; HDI                                      | TMZ            | √         |            | [147] |
|                                                                                                | PLGA                                               | SDF-1 $\alpha$ | √         | √          | [148] |
|                                                                                                | CS; PEO                                            | CuSe           | √         | √          | [149] |
| Oral cancer                                                                                    | CA                                                 | MET            |           |            | [68]  |
|                                                                                                | PDLGA                                              | Diclofenac     | √         | √          | [150] |
|                                                                                                | PCL; GT                                            | astaxanthin    | √         | √          | [151] |
| Other cancers                                                                                  | PCL; PLGA                                          | EPI            | √         | √          | [152] |
|                                                                                                | PCL                                                | Rif            | √         |            | [153] |
|                                                                                                | ES100                                              | 5-FU           | √         | √          | [154] |
|                                                                                                | PLLA; PEO; REC                                     | DOX            | √         | √          | [155] |
|                                                                                                | PGCL; PLGA                                         | CTX            | √         |            | [158] |
|                                                                                                | Polyglyconate; porcine gelatin                     | CCL17          | √         | √          | [159] |
|                                                                                                | PEO; zein                                          | GA             | √         |            | [160] |
